# Supplementary material
Source: PubMed Central journal article supplement (PMC4821085)
Supplement: supp_1.1.e4_Figure_e-1.pdf [file supp_1.1.e4_Figure_e-1.pdf]

**Figure e-1 – Mutant DNMI proteins co-localize with wild type DNMI**

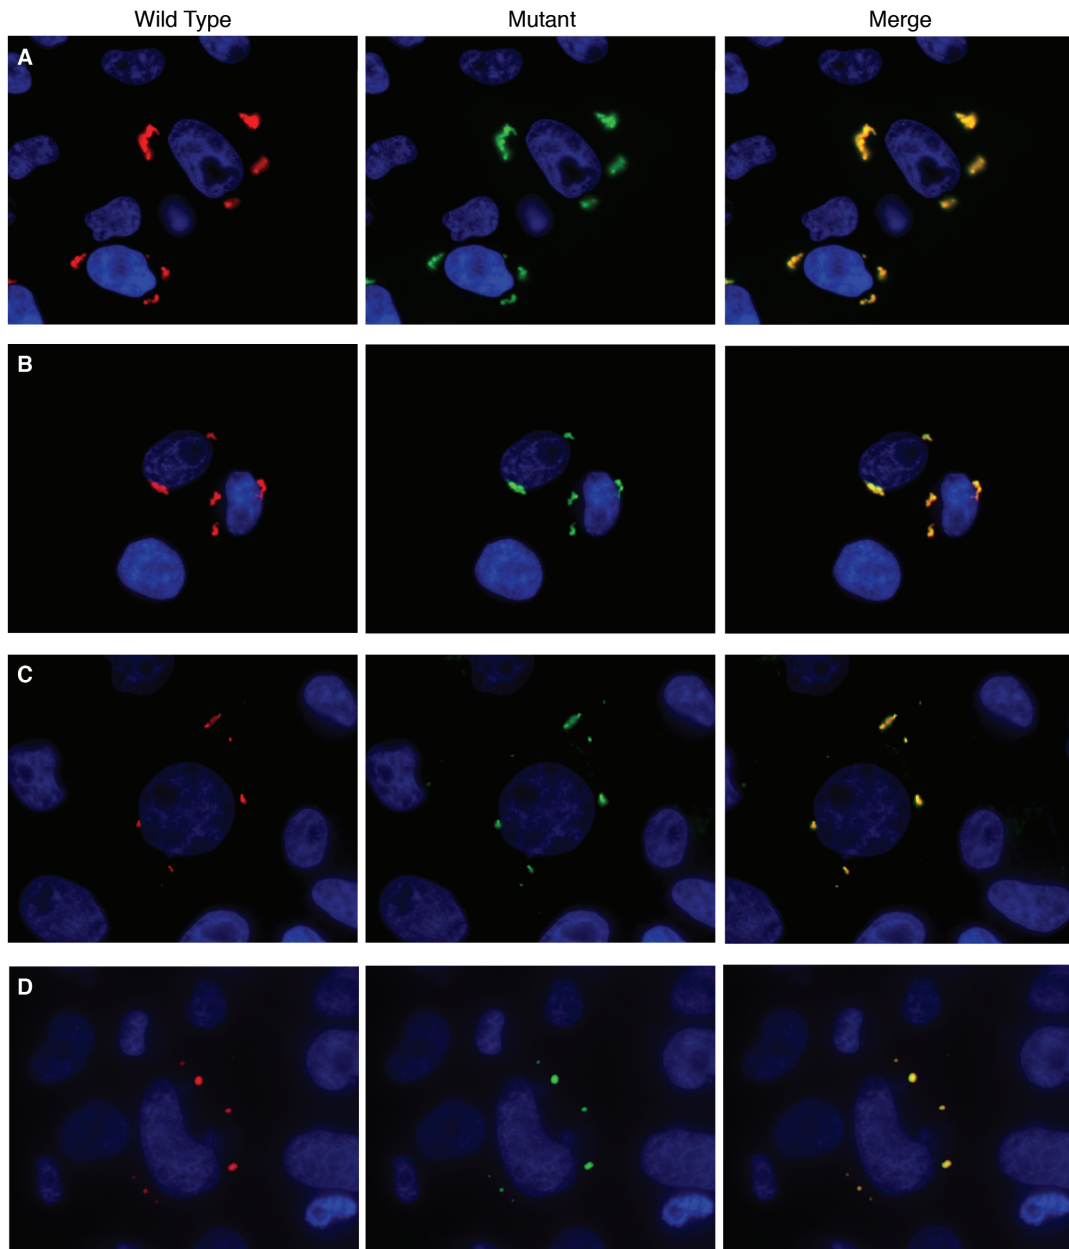

HeLa cells were co-transfected with RFP-tagged wild type DNMI and GFP-tagged mutant DNMI.

- (a) GFP- and RFP- tagged wild type constructs significantly co-localize.
- (b-d) The GFP-tagged mutant DNMI proteins each co-localize with the RFP-tagged wild type DNMI. Each mutant protein forms puncta in the presence of wild type.
